# Supplementary material for: Non-microbial methane formation in oxic soils
Source: Copernicus journal article supplement (doi:10.5194/bg-9-5291-2012), 2012-12-20
Supplement: Supplementary file 1 [file bg-9-5291-2012-supplement.pdf]

# 1 **Supplementary information**

## 2 **1. Possibility of desorption**

3 It has been suggested that CH<sub>4</sub> release from plant materials might result from CH<sub>4</sub> desorption in  
4 low-CH<sub>4</sub> environments, e.g., after flushing with CH<sub>4</sub> free air (Kirschbaum et al., 2007).

5 It has previously been shown by Kirschbaum and Walcroft (2008) that desorption does not play  
6 a significant role under ambient conditions of moisture, temperature and CH<sub>4</sub> concentrations  
7 (Kirschbaum and Walcroft, 2008). However, whereas Kirschbaum and Walcroft used ambient  
8 CH<sub>4</sub> levels for adsorption and investigated the desorption at ambient temperatures under low  
9 CH<sub>4</sub> conditions, we also investigated adsorption to peat at much higher CH<sub>4</sub> concentrations of  
10 12,500 ppm, 100 ppm and 10 ppm and its desorption at 50 °C. For each concentration level  
11 vials were prepared and left to rest at room temperature for 3 days to allow the CH<sub>4</sub> to adsorb to  
12 the peat surfaces. The samples were then divided into two groups, one being lyophilised  
13 overnight, then flushed with CH<sub>4</sub> free air, while one was only flushed with CH<sub>4</sub> free air. A third  
14 group of three peat samples, which contained no additional CH<sub>4</sub> but were also lyophilised and  
15 flushed with CH<sub>4</sub> free air, served as control. Finally, all three groups were supplemented with  
16 water and incubated at 50 °C for 17 h.

17 The objective of this experiment was to determine whether the observed CH<sub>4</sub> emissions were  
18 indeed formed during the incubations or were due to an artefact caused by desorption of CH<sub>4</sub>,  
19 possibly arising from microbial origin, from the material under higher than ambient CH<sub>4</sub> levels  
20 in the soil or peat. Moreover, this experiment also enables us to determine if any of the adsorbed  
21 CH<sub>4</sub> following the lyophilisation process could account for some of the CH<sub>4</sub> observed in our  
22 measurements.

23 The peat samples treated with the highest CH<sub>4</sub> levels (12,500 ppm) showed an increased CH<sub>4</sub>  
24 release in both CH<sub>4</sub> supplemented groups ( $2.2 \pm 0.9 \text{ ng g}^{-1} (\text{dw}) \text{ h}^{-1}$  and  $3.3 \pm 0.3 \text{ ng g}^{-1} (\text{dw}) \text{ h}^{-1}$   
25 for samples with and without lyophilisation, respectively) compared to the untreated control  
26 group ( $0.4 \pm 0.1 \text{ ng g}^{-1} (\text{dw}) \text{ h}^{-1}$ ). However, the samples treated with 100 and 10 ppm CH<sub>4</sub>

27 showed no significant increase, both with and without lyophilisation. Furthermore, samples of  
28 kaolinite and sea sand were tested for their adsorption potential of CH<sub>4</sub> using 10 ppm CH<sub>4</sub> but  
29 again no adsorption/desorption was detected.

30

## 31 2. Exclusion of methane oxidation by methane consuming bacteria

32 Several experiments from the water dependence study were repeated to investigate the possible  
33 influence of methanotrophic bacteria on CH<sub>4</sub> emissions. For the dry samples and those with a  
34 sample to water ratio of 2:1, 1:1 and 1:2 the experiment was repeated at 40 °C with the addition  
35 of 20 µl difluoromethane (DFM) per vial. DFM was added to inhibit CH<sub>4</sub> oxidation by any  
36 methanotrophic bacteria (Miller et al., 1998) possibly present in the non-sterile samples. No  
37 significant effect was observed on the emission rates after adding DFM, leading to the  
38 conclusion that there were no methanotrophic bacteria active in the lyophilised samples.  
39 Measured CH<sub>4</sub> emissions were  $0.8 \pm 0.2 \text{ ng g}^{-1} (\text{dw}) \text{ h}^{-1}$  without DFM and  $0.4 \pm 0.02 \text{ ng g}^{-1} (\text{dw})$   
40  $\text{h}^{-1}$  with DFM for the dry samples. The wetted samples showed emissions ranging from  $1.6 \pm 0.1$   
41 to  $1.9 \pm 0.1 \text{ ng g}^{-1} (\text{dw}) \text{ h}^{-1}$  with and without added DFM.

42

## 43 3. Arrhenius plots

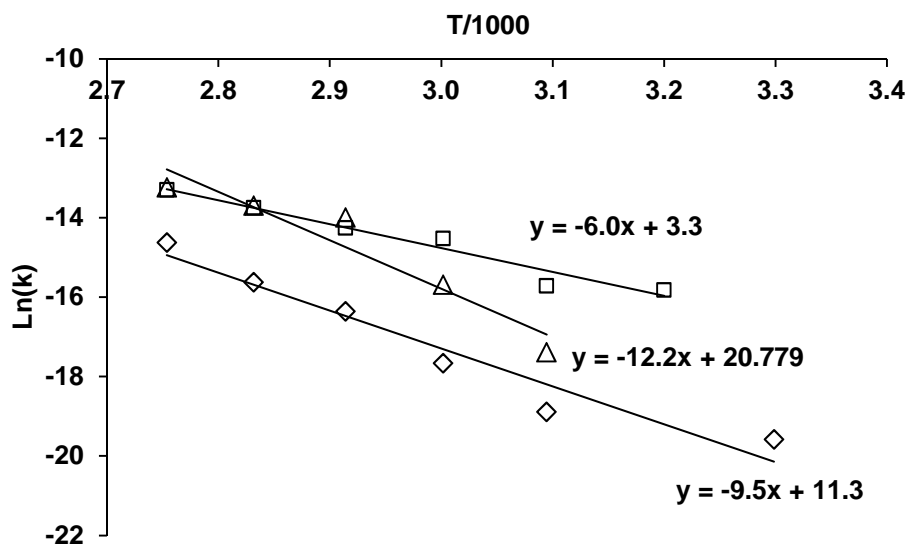

44

45 **Fig S1:** Arrhenius plot for formation of CH<sub>4</sub> in peat PH (◇), soil SL (□) and soil SG (△).

46

47 We used the experimental data from samples SL, SG and PH to draw Arrhenius plots for CH<sub>4</sub>  
48 formation (Fig. S1). For all samples the results were found to follow a linear relationship at  
49 temperatures ranging from 30 to 90 °C. The activation energies (E<sub>a</sub>) for CH<sub>4</sub> formation for each  
50 sample, calculated from the slope of the line, yielded values of 50.1 kJ mol<sup>-1</sup>, 77.5 kJ mol<sup>-1</sup> and  
51 79.2 kJ mol<sup>-1</sup> for SL, SG and PH, respectively. Again, this is strong supportive evidence of an  
52 abiotic underlying process as reactions with activation energies higher than 50 kJ mol<sup>-1</sup> are  
53 considered to be abiotic (Schönknecht et al., 2008).

54

## 55 **References**

- 56 Kirschbaum, M. U. F. and Walcroft, A.: No detectable aerobic methane flux from plant  
57 material, nor from adsorption/desorption processes, *Biogeosciences*, 5, 1551–1558, 2008.
- 58 Kirschbaum, M. U. F., Niinemets, Ü., Bruhn, D., and Winters, A. J.: How Important is Aerobic  
59 Methane Release by Plants?, *Functional Plant Biol.*, 1, 138–145, 2007.
- 60 Miller, L. G., Sasson, C., and Oremland, R. S.: Difluoromethane, a new and improved inhibitor  
61 of methanotrophy, *Appl. Environ. Microbiol.*, 64, 4357–4362, 1998.
- 62 Schönknecht, G., Brown, J. E., and Verchot-Lubicz, J.: Plasmodesmata transport of GFP alone  
63 or fused to potato virus X TGBp1 is diffusion driven, *Protoplasma*, 232, 143–152,  
64 doi:10.1007/s00709-008-0293-z, 2008.

65
